# Supplementary material for: Oncolytic measles virus induces tumor necrosis factor-related apoptosis-inducing ligand (TRAIL)-mediated cytotoxicity by human myeloid and plasmacytoid dendritic cells
Source: PubMed Central journal article supplement — Oncoimmunology. 2016 Nov 18;6(1):e1261240. doi: 10.1080/2162402X.2016.1261240 (PMC5283625; doi:10.1080/2162402x.2016.1261240), 2016-11-18
Supplement: koni-06-01-1261240-s001.pdf [file koni-06-01-1261240-s001.pdf]

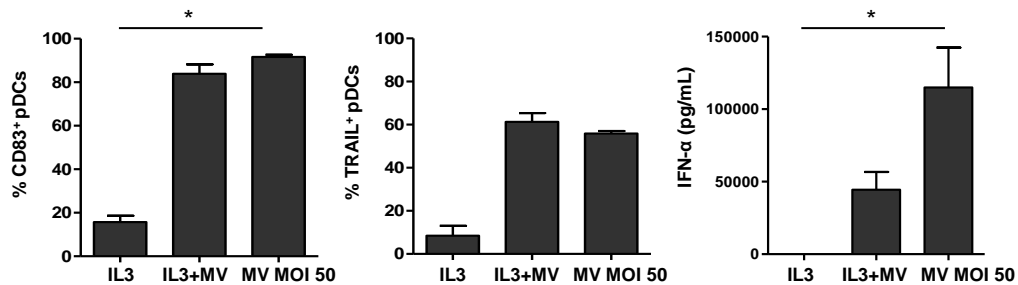

**Supplemental figure 1: At high MOI, MV induces activation of pDCs without IL3**

pDCs were cultured with IL3, IL3+MV (MOI=10) or with MV alone at a MOI=50. The expression of surface markers by the indicated cells was determined by flow cytometry. IFN- $\alpha$  secretion was measured by ELISA. Results are expressed as the mean $\pm$ SEM of three independent experiments.

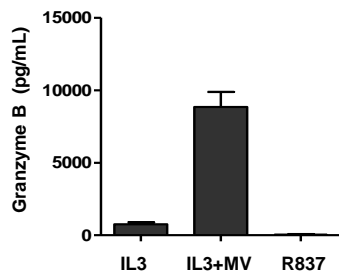

### **Supplemental figure 2: MV induces granzyme B secretion by pDCs**

pDCs were cultured with IL3, IL3+MV or the TLR7 agonist R837. Granzyme B secretion was measured by ELISA. Results are expressed as the mean±SEM of two independent experiments

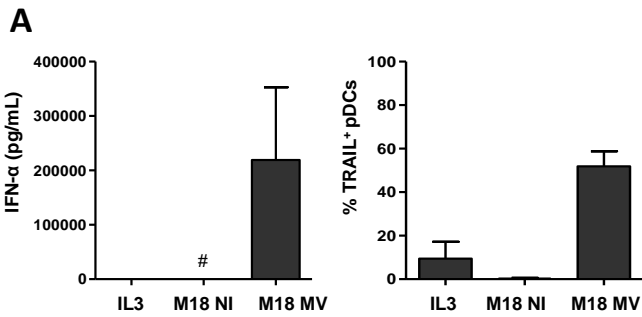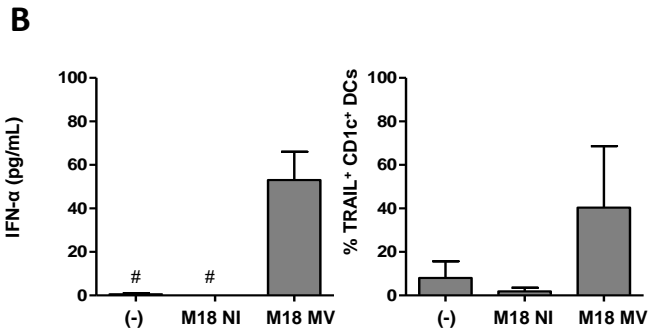

**Supplemental figure 3: Tumor cells have to be infected by MV to induce IFN- $\alpha$  secretion and TRAIL expression by DCs**

pDCs were cultured with IL3, with non-infected or MV-infected M18 melanoma cells (A). CD1c<sup>+</sup> DCs were cultured alone (-), with non-infected or MV-infected M18 melanoma cells (B). IFN- $\alpha$  secretion was measured by ELISA. #, values are below the limit of detection of the kit (7 pg/mL). The expression of TRAIL by the indicated cells was determined by flow cytometry. Results are expressed as the mean  $\pm$ SEM of two independent experiments.

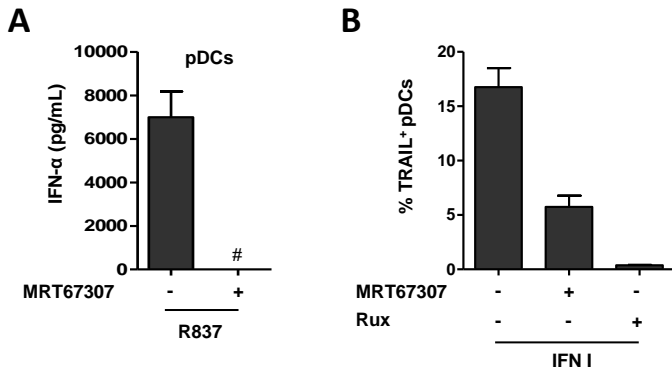

**Supplemental figure 4: The RLR inhibitor MRT67307 impairs the TLR7 and type I IFN signaling pathways**

pDCs were pretreated or not with MRT67307 and then cultured with the TLR7 agonist R837 (A). pDCs were pretreated or not with MRT67307 or Ruxolitinib and then cultured with type I IFNs (IFN- $\alpha$  and IFN- $\beta$ ) (B). IFN- $\alpha$  secretion was measured by ELISA. #, values are below the limit of detection of the kit (7 pg/mL). The expression of TRAIL by pDCs was determined by flow cytometry. Results are expressed as the mean $\pm$ SEM of two independent experiments.

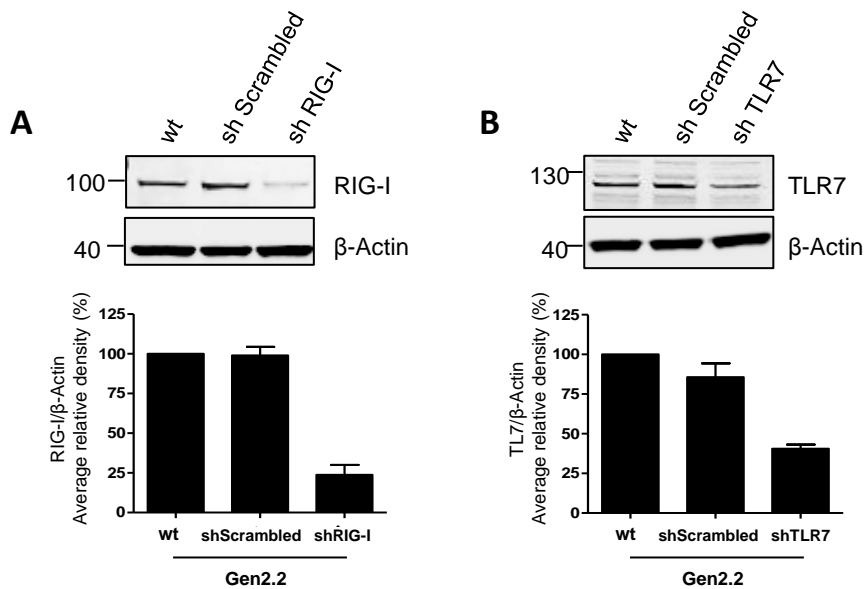

### Supplemental figure 5: shRNA-mediated knockdown of RIG-I and TLR7 in Gen2.2 cells

(A, B) Wild-type (wt) Gen2.2 cells, or modified Gen2.2 cell lines transduced with lentiviruses expressing Scrambled shRNA, RIG-I- (A) or TLR7- (B) specific shRNAs were analyzed by Western blot using antibodies against indicated proteins. Histograms display the quantitative analysis of the extent of shRNA-mediated knockdown of RIG-I and TLR7. Gen2.2 cells were lysed in a buffer containing 50 mM Tris-HCl pH 7.5, 150 mM sodium chloride, 0.5% (v/v) Igepal, and protease inhibitor cocktail (Complete Mini EDTA-free tablets, Roche Diagnostic). Protein concentration was determined using the Pierce™ 660nm Protein Assay (Thermo-Scientific). SDS gel electrophoresis was performed using precast Bis-Tris 4–12% gradient polyacrylamide gels, in the MOPS buffer system (Life Technologies). Proteins were transferred to nitrocellulose membranes (Trans-Blot Turbo Midi Nitrocellulose Transfer Packs, Biorad) then probed with the indicated primary antibodies and appropriate IR dye-conjugated secondary. Rabbit anti-TLR7 antibody was from Abcam. Mouse anti-RIG-I (clone Alme-1) was from Adipogen. Mouse  $\beta$ -Actin (AC-15) was from Sigma-Aldrich. The membranes were scanned using the Odyssey IR imager (LI-COR®). Relative abundance of protein was determined by quantitative densitometry using ImageJ software (NIH, MD, U.S.A.). Densitometry data were normalized to  $\beta$ -actin.
